# Supplementary material
Source: PubMed Central journal article supplement (PMC3431655)

LAPTM5 is a Positive Regulator of Pro-inflammatory signaling pathways in Macrophages

**Wioletta K. Glowacka<sup>1</sup>, Philipp Alberts<sup>1</sup>, Rika Ouchida<sup>2</sup>, Ji-Yang Wang<sup>2</sup> and Daniela Rotin<sup>1\*</sup>**

<sup>1</sup>Program in Cell Biology, the Hospital for Sick Children, and Biochemistry Department, University of Toronto, Toronto, Ontario, Canada, M5G 1L7, and <sup>2</sup>Laboratory for Immune Diversity, Riken Research Center for Allergy and Immunology, Yokohama 230-0045, Japan

\*Correspondence:

Dr. Daniela Rotin

The Hospital for Sick Children,

TMDT-MaRS, 11-305, 101 College St.

Toronto, Ontario, Canada, M5G 1L7

Tel: (416) 813-5098

FAX: (416) 813-8456

Email: drotin@sickkids.ca

**Running title:** LAPTM5 is required for macrophage activation.

**Key words:** lysosome, late endosome, cytokine secretion

**Supplementary Figure S1. Endogenous expression of LAPTM5 in macrophages.** (A) Confocal fluorescence analysis of RAW264.7 cells transfected with control or LAPTM5 siRNA. At 72h post transfection, cells were fixed and immunostained with anti-LAPTM5 antibody. Bar, 5  $\mu$ m. (B) Knockdown of LAPTM5 using shRNA. Western blot analysis of RAW264.7 cell lines stably expressing control or LAPTM5 shRNA. Cell lysates were immunoblotted with anti-LAPTM5 or actin antibodies as a control for protein loading

**Supplementary Figure S2. LAPTM5 does not co-localize with transferrin.** RAW264.7 cells were serum-starved for 2h in DMEM and subsequently incubated with 50  $\mu$ g/ml Alexa 488-labeled transferrin at 37°C. After 60min uptake, excess transferrin was washed away and cells were fixed and immunostained with antibodies towards LAPTM5. Representative confocal images are shown. The merged panel shows an overlay of the two channels. Bar, 5  $\mu$ m. Quantification of co-localization between LAPTM5 and transferrin was performed on randomly selected cells using Volocity 5.4.1 software and expressed as Colocalization Coefficient M2 = 0.221, r(20), p>0.10 (corresponding to the degrees of freedom (r) and level of significance (p)).

**Supplementary Figure S3. A20 is upregulated in LAPTM5-deficient RAW264.7 cells.** Stable RAW264.7 cells expressing control or LAPTM5 shRNA were stimulated with (A) 1 $\mu$ g/ml LPS or (B) 50 ng/ml TNF $\alpha$  for the indicated time points. Cells were lysed and analyzed by immunoblotting with antibodies towards A20 and actin as a control for protein loading. Note increased basal A20 expression in RAW264.7 cells expressing shRNA against LAPTM5 compared to control cells, indicated by the asterisks. Panels on the right show quantification of basal A20 protein levels relative to actin from control (white column) and LAPTM5 knockdown (black column) RAW264.7 cells. The graph indicates the increase of A20 protein in LAPTM5 knockdown relative to control cells and is presented as mean  $\pm$  SD of three independent experiments.

# Figure S1

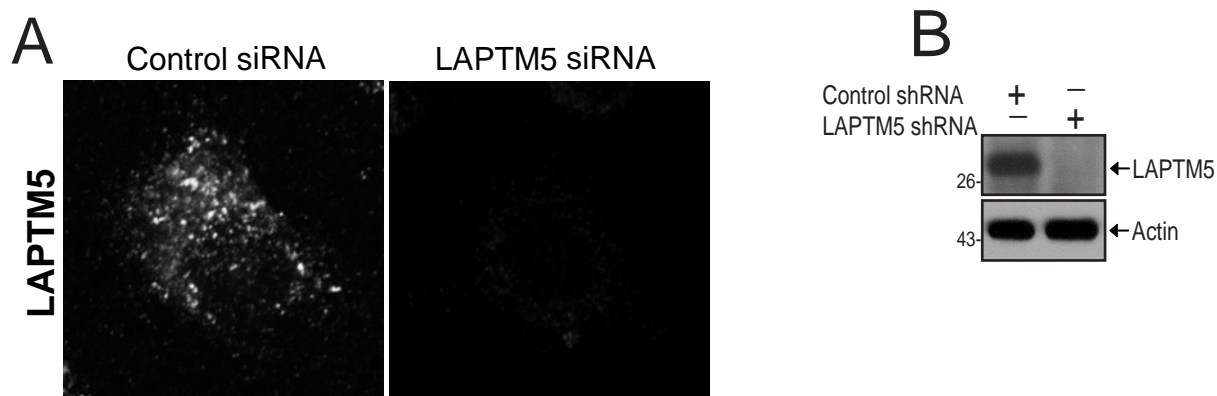

**Figure S2**

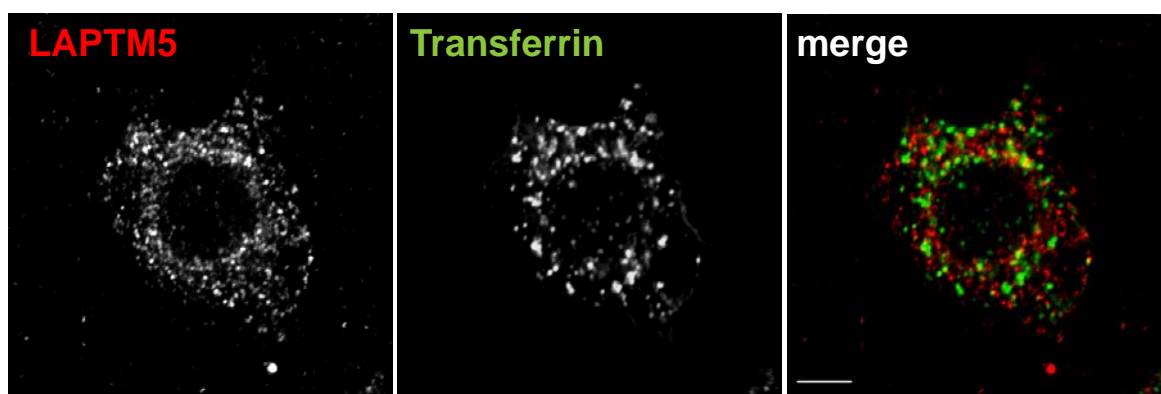

# Figure S3

## A

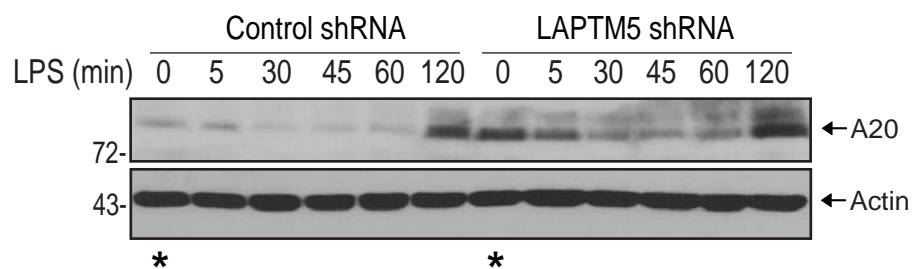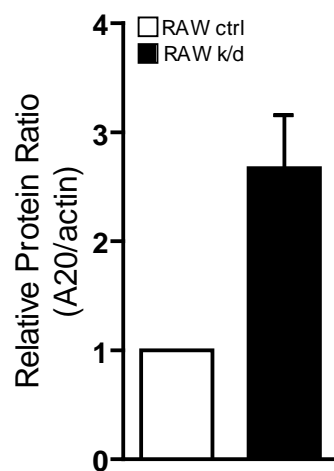

## B

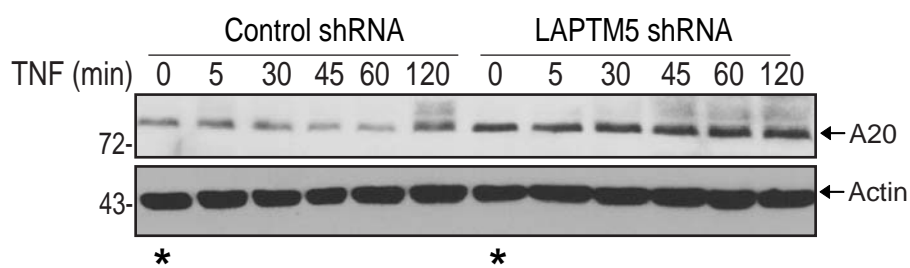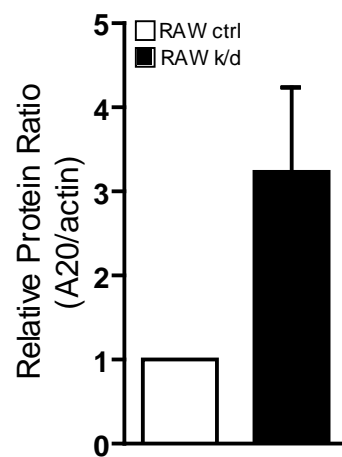

Supplement: supp_M112.355917_jbc.M112.355917-1.pdf [file supp_M112.355917_jbc.M112.355917-1.pdf]
